# Supplementary material
Source: HighWire-hosted journal article supplement (https://jnm.snmjournals.org/highwire/filestream/109609/field_highwire_adjunct_files/0/263971_Supplemental_Data.pdf)
Supplement: 263971_Supplemental_Data.pdf [file 263971_Supplemental_Data.pdf]

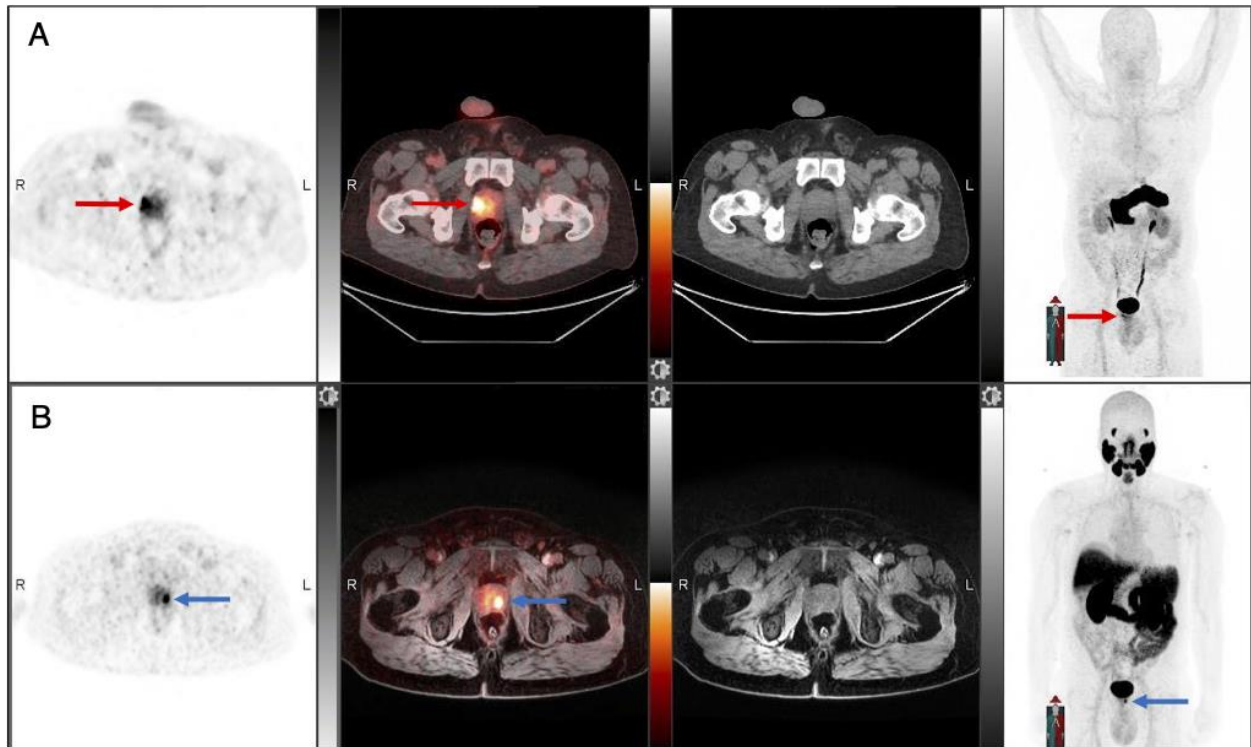

**Supplemental Figure 1:** 54-year-old patient with intermediate-risk prostate cancer and PSA 5.09 ng/mL.  $^{68}\text{Ga}$ -RM2 PET/CT (A, axial PET, fused PET/CT, CT, and MIP) shows true positive focal uptake right mid-apex (red arrows) while  $^{68}\text{Ga}$ -PSMA11 PET/MRI (B) is false negative, and shows false positive uptake mid-apex left of the prostate (blue arrows). Final histopathology demonstrated Gleason score 4+4 prostate adenocarcinoma right mid-apex.

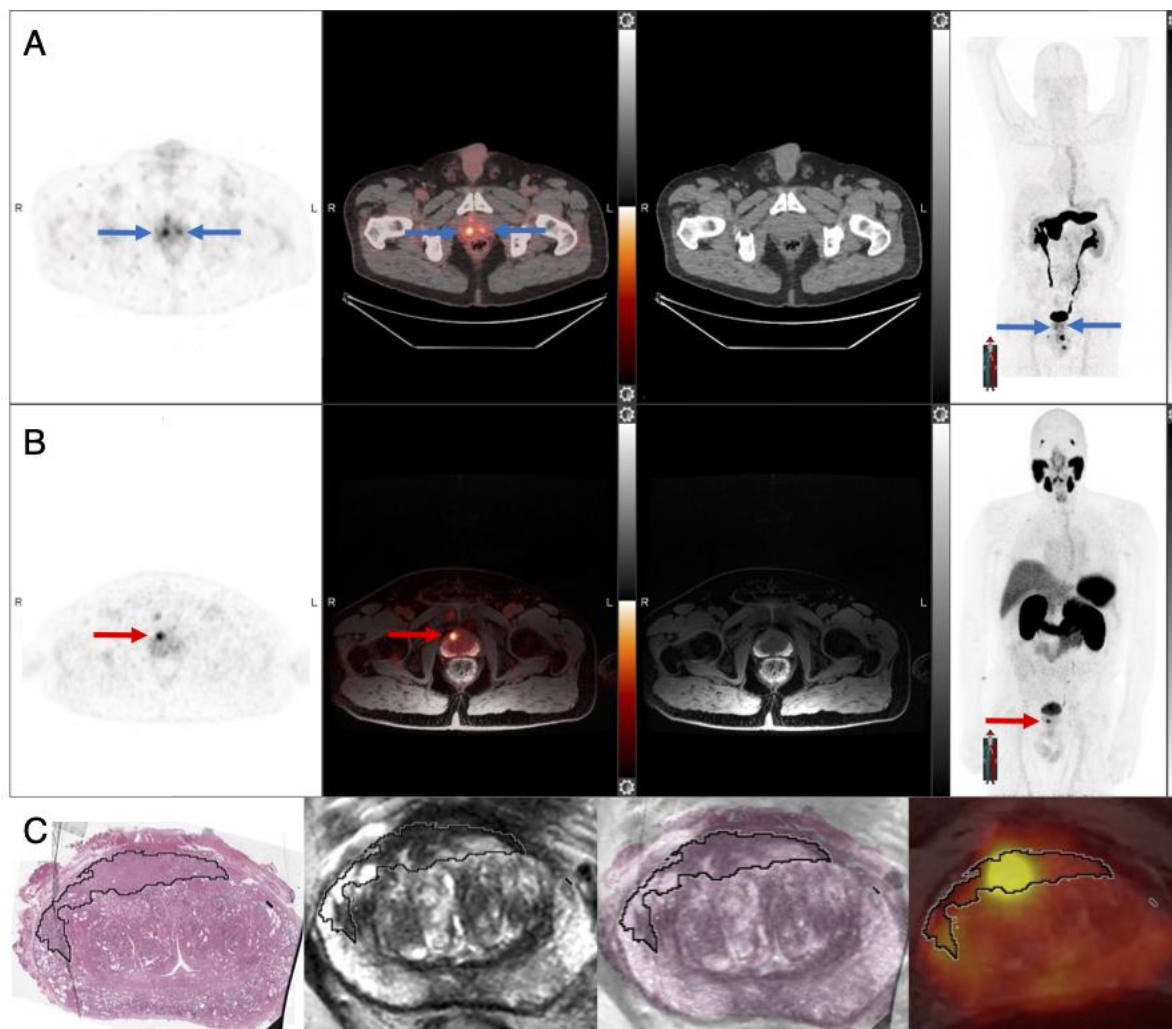

**Supplemental Figure 2** 64-year-old patient with high-risk prostate cancer and PSA 8.8 ng/mL.  $^{68}\text{Ga}$ -RM2 PET/CT (A, axial PET, fused PET/CT, CT, and MIP) shows focal uptake bilateral in the prostate (blue arrows) while  $^{68}\text{Ga}$ -PSMA PET/MRI (B) demonstrates uptake right anterior (red arrows). Histology, overlaid with pre-operative axial T2WI and  $^{68}\text{Ga}$ -PSMA11 fused PET/MRI (C) showed actual disease expansion crossing the midline to the left side (black outline) correlating to a Gleason score 3+4 prostate adenocarcinoma.

**Supplemental Table 1:** Sensitivity, specificity, and accuracy (95% confidence interval) of all modalities for prostate cancer localization.

| <b>Modality</b>               | <b>Sensitivity</b> | <b>Specificity</b> | <b>Accuracy</b>    |
|-------------------------------|--------------------|--------------------|--------------------|
| <b><sup>68</sup>Ga-RM2</b>    | 97.9% (88.7, 99.9) | 64.7% (38.3, 85.8) | 89.1% (78.8, 95.5) |
| <b><sup>68</sup>Ga-PSMA11</b> | 95.0% (75.1, 99.9) | 66.7% (22.3, 95.7) | 88.5% (69.8, 97.6) |
| <b>mpMRI</b>                  | 77.3% (62.2, 88.5) | 75.0% (47.6, 92.7) | 76.7% (64.0, 86.6) |

**Supplemental Table 2:** Sensitivity, specificity, and accuracy (95% confidence interval) of all modalities for prostate cancer and lymph node metastases localization.

| <b>Modality</b>               | <b>Sensitivity</b> | <b>Specificity</b> | <b>Accuracy</b>    |
|-------------------------------|--------------------|--------------------|--------------------|
| <b><sup>68</sup>Ga-RM2</b>    | 87.1% (76.1, 94.3) | 90.8% (81, 96.5)   | 89% (82.2, 93.8)   |
| <b><sup>68</sup>Ga-PSMA11</b> | 76.7% (57.7, 90.1) | 95.5% (77.2, 99.9) | 84.6% (71.9, 93.1) |
| <b>mpMRI</b>                  | 57.6% (44.1, 70.4) | 92.9% (82.7, 98.0) | 74.8% (65.8, 82.4) |

**Supplemental Table 3:** Sensitivity, specificity, and accuracy (95% confidence interval) for prostate cancer lesions of <sup>68</sup>Ga-RM2 and <sup>68</sup>Ga-PSMA11 PET, stratified to participants with intermediate- and high-risk PC.

| <b><sup>68</sup>Ga-RM2</b>    | <b>Sensitivity</b>   | <b>Specificity</b>   | <b>Accuracy</b>      |
|-------------------------------|----------------------|----------------------|----------------------|
| <b>Intermediate-risk</b>      | 95.5% (77.2, 99.9)   | 62.5% (24.5, 91.5)   | 86.7% (69.3, 96.2)   |
| <b>High-risk</b>              | 100.0% (86.3, 100.0) | 66.7% (29.9, 92.5)   | 91.2% (76.3, 98.1)   |
| <b><sup>68</sup>Ga-PSMA11</b> |                      |                      |                      |
| <b>Intermediate-risk</b>      | 100.0% (71.5, 100.0) | 100.0% (29.2, 100.0) | 100.0% (76.8, 100.0) |
| <b>High-risk</b>              | 88.9% (51.8, 99.7)   | 100.0% (29.2, 100.0) | 91.7% (61.5, 99.8)   |
